# Supplementary material for: Establishing Normative Values to Determine the Prevalence of Biochemical Hyperandrogenism in Premenopausal Women of Different Ethnicities from Eastern Siberia
Source: MDPI journal article supplement (doi:10.3390/diagnostics13010033), 2022-12-22
Supplement: s1 [file s1]

**Table S1.** Socio-demographic characteristics of healthy controls by ethnicity.

| Parameters                                          | Caucasians n = 88 (1) | Asians<br>n = 42 (2) | Mixed<br>n = 13 (3)          | p-Value                                                                                                                                        |
|-----------------------------------------------------|-----------------------|----------------------|------------------------------|------------------------------------------------------------------------------------------------------------------------------------------------|
| Age, years,<br>Mean±SD                              | 34.2±6.13<br>35.0     | 36.2±5.4<br>38.0     | 33.0±6.2<br>34.0 (32.0;37.0) | $p_U = 0.66^{1-2}$<br>$p_U = 0.75^{1-3}$                                                                                                       |
| Median (LQ;UQ)                                      | (30.0;39.0)           | (32.0;40.0)          |                              | $p_U = 0.97^{2-3}$                                                                                                                             |
| <i>Marital status, n/N (%)</i>                      |                       |                      |                              |                                                                                                                                                |
| Single                                              | 17/88<br>(19.3%)      | 11/42<br>(26.1%)     | 3/13<br>(2.10%)              | $p_{\chi^2}^{1,2,3} = 0.62$                                                                                                                    |
| Married                                             | 49/88<br>(55.6%)      | 21/42<br>(50.0 %)    | 10/13<br>(76.9%)             | $p_{\chi^2}^{1,2,3} = 0.23$                                                                                                                    |
| Living with<br>another                              | 12/88<br>(13.6%)      | 3/42<br>(7.14%)      | 0/13<br>(0.00%)              | $p_{\chi^2}^{1,2,3} = 0.26$                                                                                                                    |
| Separated                                           | 0/88<br>(0.00%)       | 0/42<br>(0.00%)      | 0/13<br>(0.00%)              |                                                                                                                                                |
| Divorced                                            | 8/88<br>(9.09%)       | 5/42<br>(11.9%)      | 0/13<br>(0.00%)              | $p_{\chi^2}^{1,2,3} = 0.43$                                                                                                                    |
| Widowed                                             | 1/88<br>(1.14%)       | 1/42<br>(2.38%)      | 0/13<br>(0.00%)              | $p_{\chi^2}^{1,2,3} = 0.78$                                                                                                                    |
| Would rather not<br>say                             | 1/88<br>(1.14%)       | 1/42<br>(2.38%)      | 0/13<br>(0.00%)              | $p_{\chi^2}^{1,2,3} = 0.78$                                                                                                                    |
| <i>Occupation, n/N (%)</i>                          |                       |                      |                              |                                                                                                                                                |
| Legislators.<br>senior officials.<br>and managers   | 3/88<br>(3.45%)       | 1/42<br>(2.44%)      | 0/13<br>(0.00%)              | $p_{\chi^2}^{1,2,3} = 0.75$                                                                                                                    |
| Professionals                                       | 35/88<br>(40.2%)      | 25/42<br>(60.9%)     | 5/13<br>(38.4%)              | $p_{\chi^2}^{1,2,3} = 0.06$<br>$p_{\chi^2} = 0.02^{1-2}$<br>$p_{\chi^2 \text{Fisher}} = 0.57^{1-3}$<br>$p_{\chi^2 \text{Fisher}} = 0.13^{2-3}$ |
| Technicians and<br>associate<br>professionals       | 16/88<br>(18.3%)      | 5/42<br>(12.2%)      | 5/13<br>(38.4%)              | $p_{\chi^2}^{1,2,3} = 0.10$                                                                                                                    |
| Office clerks                                       | 10/88<br>(11.4%)      | 6/42<br>(14.6%)      | 1/13<br>(7.6%)               | $p_{\chi^2}^{1,2,3} = 0.78$                                                                                                                    |
| Service workers.<br>and shop and<br>market sales    | 6/88<br>(6.90%)       | 3/42<br>(7.32%)      | 0/13<br>(0.00%)              | $p_{\chi^2}^{1,2,3} = 0.60$                                                                                                                    |
| Skilled<br>agricultural and<br>fishery workers      | 2/88<br>(2.30%)       | 0/42<br>(0.00 %)     | 0/13<br>(0.00%)              | $p_{\chi^2}^{1,2,3} = 0.52$                                                                                                                    |
| Craft and related<br>trades workers                 | 9/88<br>(10.3%)       | 1/42<br>(2.44%)      | 1/13<br>(7.69%)              | $p_{\chi^2}^{1,2,3} = 0.27$                                                                                                                    |
| Plant and<br>machine<br>operators and<br>assemblers | 2/ 88<br>(2.30%)      | 0/42<br>(0.00%)      | 0/13<br>(0.00%)              | $p_{\chi^2}^{1,2,3} = 0.72$                                                                                                                    |

|                            |                  |                  |                  |                                                                                                                                                     |
|----------------------------|------------------|------------------|------------------|-----------------------------------------------------------------------------------------------------------------------------------------------------|
| Elementary occupations     | 4/ 88<br>(4.60%) | 0/42<br>(0.00%)  | 0/13<br>(0.00%)  | $p_{\chi^2 1,2,3}=0.26$                                                                                                                             |
| Armed forces               | 0/88<br>(0.00%)  | 0/42<br>(0.00%)  | 1/13<br>(7.69%)  |                                                                                                                                                     |
| Missing data on occupation | 1/88<br>(1.14%)  | 1/42<br>(2.44%)  | 0/13<br>(0.00%)  |                                                                                                                                                     |
| Education, n/N(%)          |                  |                  |                  |                                                                                                                                                     |
| Doctoral degree            | 8/ 88<br>(8.24%) | 3/42<br>(7.14 %) | 5/13<br>(38.46%) | $p_{\chi^2 1,2,3}=0.003$<br>$p_{\chi^2 \text{Fisher}}=0.49^{1-2}$<br>$p_{\chi^2 \text{Fisher}}=0.01^{1-3}$<br>$p_{\chi^2 \text{Fisher}}=0.01^{2-3}$ |
| Master's degree            | 51/88<br>(58.8%) | 36/42<br>(85.7%) | 7/13<br>(53.8%)  | $p_{\chi^2 1,2,3}=0.006$<br>$p_{\chi^2}=0.002^{1-2}$<br>$p_{\chi^2 \text{ Yates}}=0.78^{1-3}$<br>$p_{\chi^2 \text{ Yates}}=0.04^{2-3}$              |
| Bachelor's degree          | 3/88<br>(3.53 %) | 0/42<br>(0.00 %) | 0/13<br>(0.00 %) | $p_{\chi^2 1,2,3}=0.37$                                                                                                                             |
| Some college               | 17/88<br>(18.8%) | 3/42<br>(7.14%)  | 1/13<br>(7.69%)  | $p_{\chi^2 1,2,3}=0.16$                                                                                                                             |
| High school or equivalent  | 1/88<br>(1.18%)  | 0/42<br>(0.00%)  | 0/13<br>(0.00%)  | $p_{\chi^2 1,2,3}=0.72$                                                                                                                             |
| Incomplete high school     | 5/88<br>(5.88%)  | 0/42<br>(0.00%)  | 0/13<br>(0.00%)  | $p_{\chi^2 1,2,3}=0.18$                                                                                                                             |
| Middle school only         | 2/88<br>(2.35%)  | 0/42<br>(0.00%)  | 0/13<br>(0.00%)  | $p_{\chi^2 1,2,3}=0.51$                                                                                                                             |
| No degree                  | 1/88<br>(1.18%)  | 0/42<br>(0.00%)  | 0/13<br>(0.00 %) | $p_{\chi^2 1,2,3}=0.72$                                                                                                                             |

$\chi^2$  - Pearson Chi-square and Fisher exact one-tailed tests. U - Mann-Whitney U Test

**Table S2.** Menstrual and reproductive history of healthy controls by ethnicity.

| Parameters                          | Caucasians<br>n = 88<br>(1)      | Asians<br>n = 42<br>(2)           | Mixed<br>n = 13<br>(3)           | p-value*         |
|-------------------------------------|----------------------------------|-----------------------------------|----------------------------------|------------------|
|                                     | Mean±SD                          |                                   |                                  |                  |
|                                     | Median (LQ;UQ)                   |                                   |                                  |                  |
| Age at menarche, years              | 13.1±1.21<br>13.0<br>(12.0;14.0) | 13.5±1.25<br>13.00<br>(13.0;14.0) | 13.2±1.09<br>13.0<br>(13.0;14.0) | $p^{1,2,3}=0.33$ |
| Min length of menstrual cycle, days | 26.3±2.24<br>26.0<br>(25.0;28.0) | 26.7±2.06<br>27.0 (25.0;28.0)     | 26.2±2.49<br>26.0 (25.0;28.0)    | $p^{1,2,3}=0.78$ |
| Max length of menstrual cycle, days | 29.3±2.23<br>30.0<br>(28.0;30.0) | 29.9±3.94<br>30.0<br>(28.0;30.0)  | 29.6±2.57<br>30.0 (27.0;32.0)    | $p^{1,2,3}=0.95$ |
| Number of pregnancies               | 2.3±2.2<br>2.0<br>(1.0; 3.0)     | 2.3±1.8<br>2.0<br>(1.0; 3.0)      | 2.6±1.4<br>2.0<br>(2.0; 3.0)     | $p^{1,2,3}=0.52$ |
| Live births                         | 1.7±0.7<br>2.0<br>(1.0; 2.0)     | 1.9±0.9<br>2.0<br>(1.0; 3.0)      | 1.8±0.6<br>2.0<br>(1.0; 2.0)     | $p^{1,2,3}=0.29$ |
| Still birth                         | 0.05±0.2<br>0.00                 | 0.05±0.3<br>0.00                  | 0.0±0.0<br>0.00                  | $p^{1,2,3}=0.51$ |

|                        |              |              |              |                  |
|------------------------|--------------|--------------|--------------|------------------|
| Spontaneous abortions  | (0.00; 0.00) | (0.00; 0.00) | (0.00; 0.00) | $p^{1,2,3}=0.63$ |
|                        | 0.1±0.4      | 0.2±0.5      | 0.1±0.3      |                  |
|                        | 0.00         | 0.00         | 0.00         |                  |
| Extrauterine pregnancy | (0.00; 0.00) | (0.00; 0.00) | (0.00; 0.00) | $p^{1,2,3}=0.70$ |
|                        | 0.04±0.2     | 0.05±0.3     | 0.1±0.3      |                  |
|                        | 0.00         | 0.00         | 0.00         |                  |
| Missed abortion        | (0.00; 0.00) | (0.00; 0.00) | (0.00; 0.00) | $p^{1,2,3}=0.28$ |
|                        | 0.1±0.4      | 0.0±0.0      | 0.2±0.6      |                  |
|                        | 0.00         | 0.00         | 0.00         |                  |
| Medical abortions      | (0.00; 0.00) | (0.00; 0.00) | (0.00; 0.00) | $p^{1,2,3}=0.14$ |
|                        | 0.8±1.5      | 0.4±0.9      | 0.9±1.1      |                  |
|                        | 0.00         | 0.00         | 1.00         |                  |
|                        | (0.00; 1.00) | (0.00; 0.00) | (0.00; 1.00) |                  |

\*Kruskal-Wallis ANOVA by Ranks.

**Table S3.** Anthropometry, vital signs and pelvic U/S parameters of healthy controls by ethnicity.

| Anthropometry And Vital Signs Parameters | Caucasians<br>n = 88          | Asians<br>n = 42 | Mixed<br>n = 13  | p-Value*        |
|------------------------------------------|-------------------------------|------------------|------------------|-----------------|
|                                          | <i>Mean±SD Median (LQ;UQ)</i> |                  |                  |                 |
| Weight, kg                               | 65.8±10.4                     | 61.2±7.81        | 60.7±6.38        | $p_{1-2}=0,01$  |
|                                          | 65.5                          | 61.1 (55.3;66.0) | 62.7             | $p_{1-3}=0,08$  |
|                                          | (57.1;74.3)                   |                  | (54.2;65.0)      | $p_{2-3}=0,96$  |
| Height,cm                                | 162±5.24                      | 161±4.48         | 162±5.03         | $p_{1-2}=0,17$  |
|                                          | 163                           | 160              | 163              | $p_{1-3}=0,89$  |
|                                          | (158;167)                     | (158;165)        | (158;165)        | $p_{2-3}=0,46$  |
| WC,cm                                    | 24.8±3.20                     | 23.5±3.20        | 23.0±2.82        | $p_{1-2}=0,03$  |
|                                          | 24.9                          | 23.3             | 23.6             | $p_{1-3}=0,06$  |
|                                          | (22.1;27.8)                   | (20.8;25.7)      | (20.4;25.1)      | $p_{2-3}=0,64$  |
| BMI,kg/m <sup>2</sup>                    | 75.4±8.9                      | 75.4±8.2         | 74.3±8.6         | $p_{1-2}=0,83$  |
|                                          | 76.5                          | 75.5             | 72.0             | $p_{1-3}=0,53$  |
|                                          | (68.5;82.0)                   | (68.0;81.0)      | (69.0;78.0)      | $p_{2-3}=0,62$  |
| Systolic blood pressure, mm Hg           | 118±9.60                      | 117±11.13        | 115±9.05         | $p_{1-2}=0.78$  |
|                                          | 117                           | 117              | 117              | $p_{1-3}=0.428$ |
|                                          | (112;123)                     | (110;127)        | (109;121)        | $p_{2-3}=0.677$ |
| Diastolic blood pressure, mm Hg          | 74.6±7.18                     | 75.1±8.40        | 76.3±6.12        | $p_{1-2}=0.746$ |
|                                          | 74.0                          | 75.5             | 77.0 (71.0;82.0) | $p_{1-3}=0.480$ |
|                                          | (69.5;79.0)                   | (69.0;82.0)      |                  | $p_{2-3}=0.691$ |
| mFG score                                | 0.43±0.72                     | 0.21±0.47        | 0.31±0.63        | $p_{1-2}=0.139$ |
|                                          | 0.00                          | 0.00             | 0.00             | $p_{1-3}=0.596$ |
|                                          | (0.00;1.00 )                  | (0.00;0.00 )     | (0.00;0.00)      | $p_{2-3}=0.711$ |
|                                          | <i>Mean±SD</i>                |                  |                  |                 |
| <i>Pelvic U/S</i>                        | <i>Median (LQ;UQ)</i>         |                  |                  |                 |
| AFC, right ovary                         | 6.56±2.19                     | 5.56±1.84        | 5.08±1.44        | $p_{1-2}=0.005$ |
|                                          | 6.00                          | 5.00 (4.00;7.00) | 5.00 (4.00;6.00) | $p_{1-3}=0.008$ |
|                                          | (5.00;8.00)                   |                  |                  | $p_{2-3}=0.53$  |
| AFC, left ovary                          | 6.44±2.39                     | 5.65 ±2.05       | 5.39±1.81        | $p_{1-2}=0.07$  |
|                                          | 6.00                          | 5.00 (4.00;7.00) | 6.00 (4.00;6.00) | $p_{1-3}=0.17$  |
|                                          | (5.00;8.00)                   |                  |                  | $p_{2-3}=0.87$  |
| Volume, right ovary, cm <sup>3</sup>     | 7.33±6.69                     | 6.29±2.32        | 5.14±1.86        | $p_{1-2}=0,48$  |

|                                     |             |                  |                  |                |
|-------------------------------------|-------------|------------------|------------------|----------------|
| Volume, left ovary, cm <sup>3</sup> | 6.09        | 6.13 (4.74;7.96) | 5.39 (3.43;6.50) | $p_{1-3}=0,04$ |
|                                     | (5.11;7.77) |                  |                  | $p_{2-3}=0,15$ |
|                                     | 6.25±1.96   | 5.40±1.96        | 5.68±1.85        | $p_{1-2}=0,01$ |
|                                     | 6.17        | 5.24 (4.05;6.45) | 5.33 (4.57;6.92) | $p_{1-3}=0,37$ |
|                                     | (4.83;7.29) |                  |                  | $p_{2-3}=0,52$ |

WC- waist circumference, BMI- body mass index, mFG score- modified Ferriman-Gallwey score, U/S-ultrasound, AFC-antral follicle count, \* Mann-Whitney U Test.

**Table S4.** Androgen profile of healthy controls by age.

| Parameters   | <35 Years<br>n = 64 | ≥35 Years<br>n = 79 | p-Value* |
|--------------|---------------------|---------------------|----------|
|              | Mean ± SD           |                     |          |
|              | Median<br>(LQ;UQ)   |                     |          |
| TT, ng/dl    | 26.1±14.0           | 24.2±15.5           | 0.22     |
|              | 25.8                | 22.0                |          |
|              | (17.3, 34.2)        | (13.3, 33.7)        |          |
| FAI          | 1.56±1.41           | 1.48±1.70           | 0.71     |
|              | 1.22                | 1.20                |          |
|              | (0.60, 2.14)        | (0.59, 1.85)        |          |
| DHEAS, µg/dl | 171±76.9            | 149±65.9            | 0.08     |
|              | 165                 | 145                 |          |
|              | (118, 210)          | (93.2, 185)         |          |

Abbreviations: TT-total testosterone, FAI—free androgen index, DHEAS- dehydroepiandrosterone sulfate. \* Mann-Whitney U Test.

**Table S5.** The UNLs as defined by the 98<sup>th</sup> percentiles in healthy controls by age.

| Parameters      | <35 Years<br>n = 64                 | ≥35 Years<br>n = 79 |
|-----------------|-------------------------------------|---------------------|
|                 | 98 <sup>th</sup> Percentile (95%CI) |                     |
| TT,<br>ng/dl    | 55.0                                | 70.3                |
|                 | (44.2, 73.0)                        | (44.1, 78.0)        |
| FAI             | 6.29                                | 4.52                |
|                 | (3.04,7.32)                         | (2.54, 14.0)        |
| DHEAS,<br>µg/dl | 366                                 | 328                 |
|                 | (284, 374)                          | (234, 355)          |

Abbreviations: TT-total testosterone, FAI—free androgen index, DHEAS- dehydroepiandrosterone sulfate.

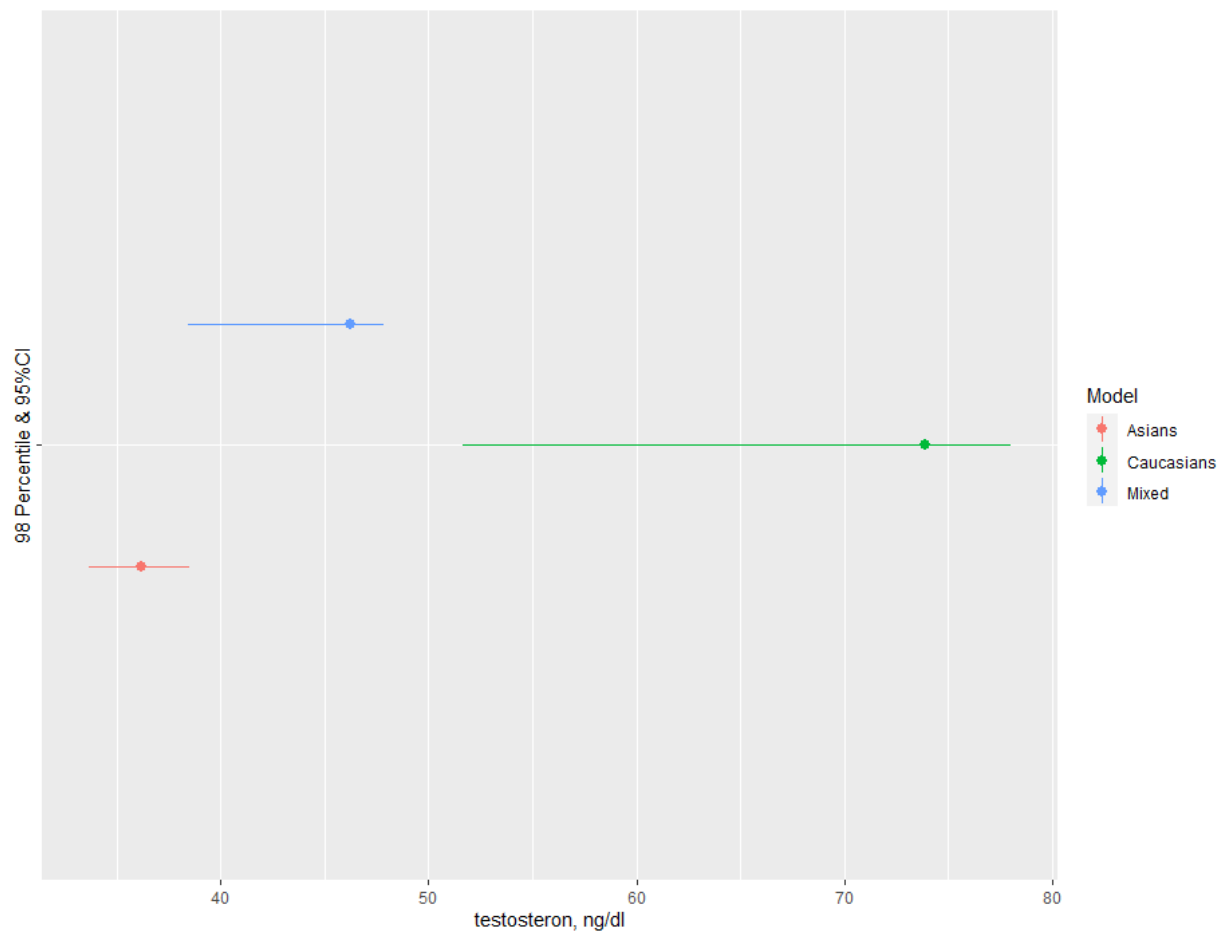

**Figure S1.** UNLs for the total testosterone (TT) by ethnicity: the analysis of the 95% CIs overlapping.

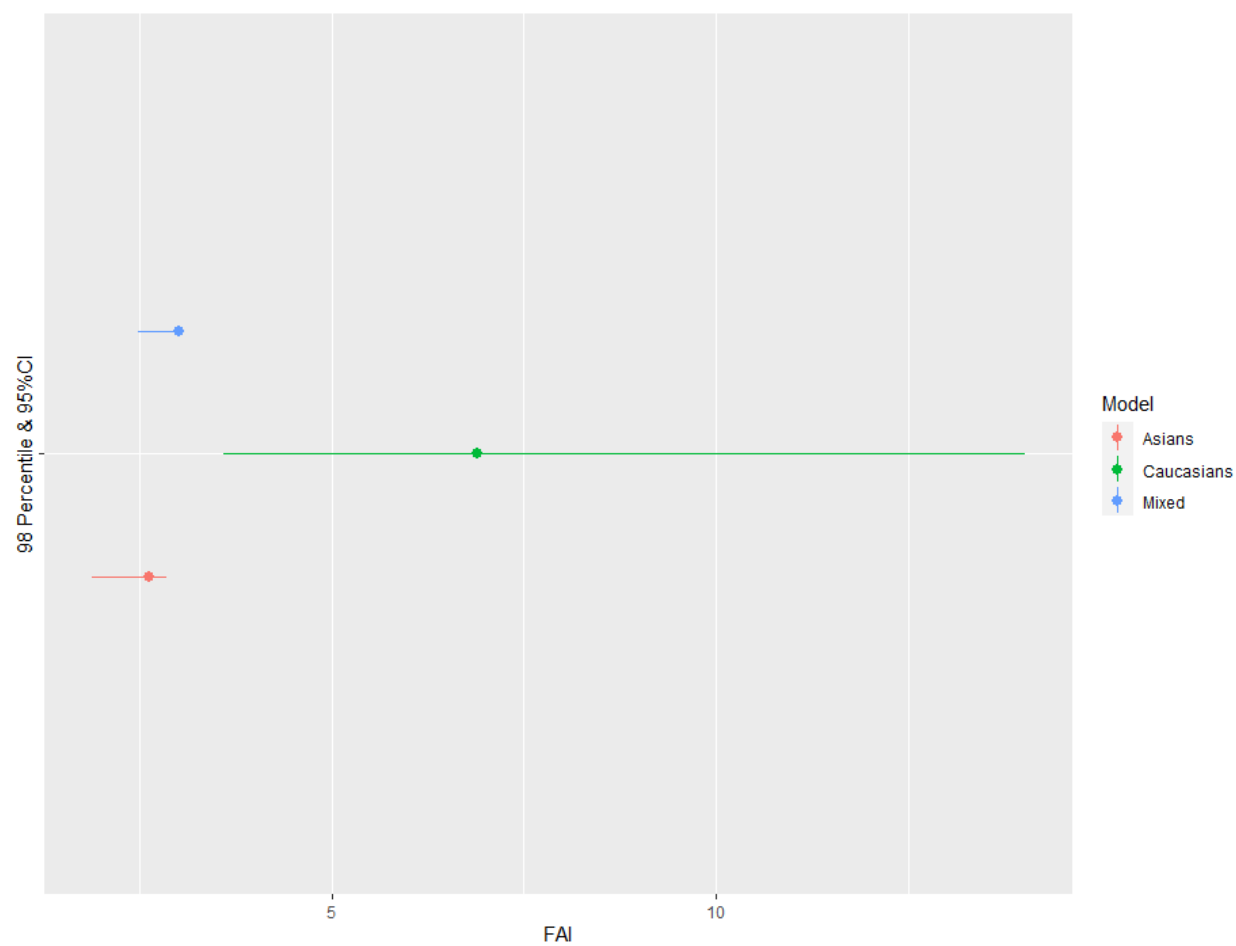

**Figure S2.** UNLs for free androgen index (FAI) by ethnicity: the analysis of the 95% CIs overlapping.

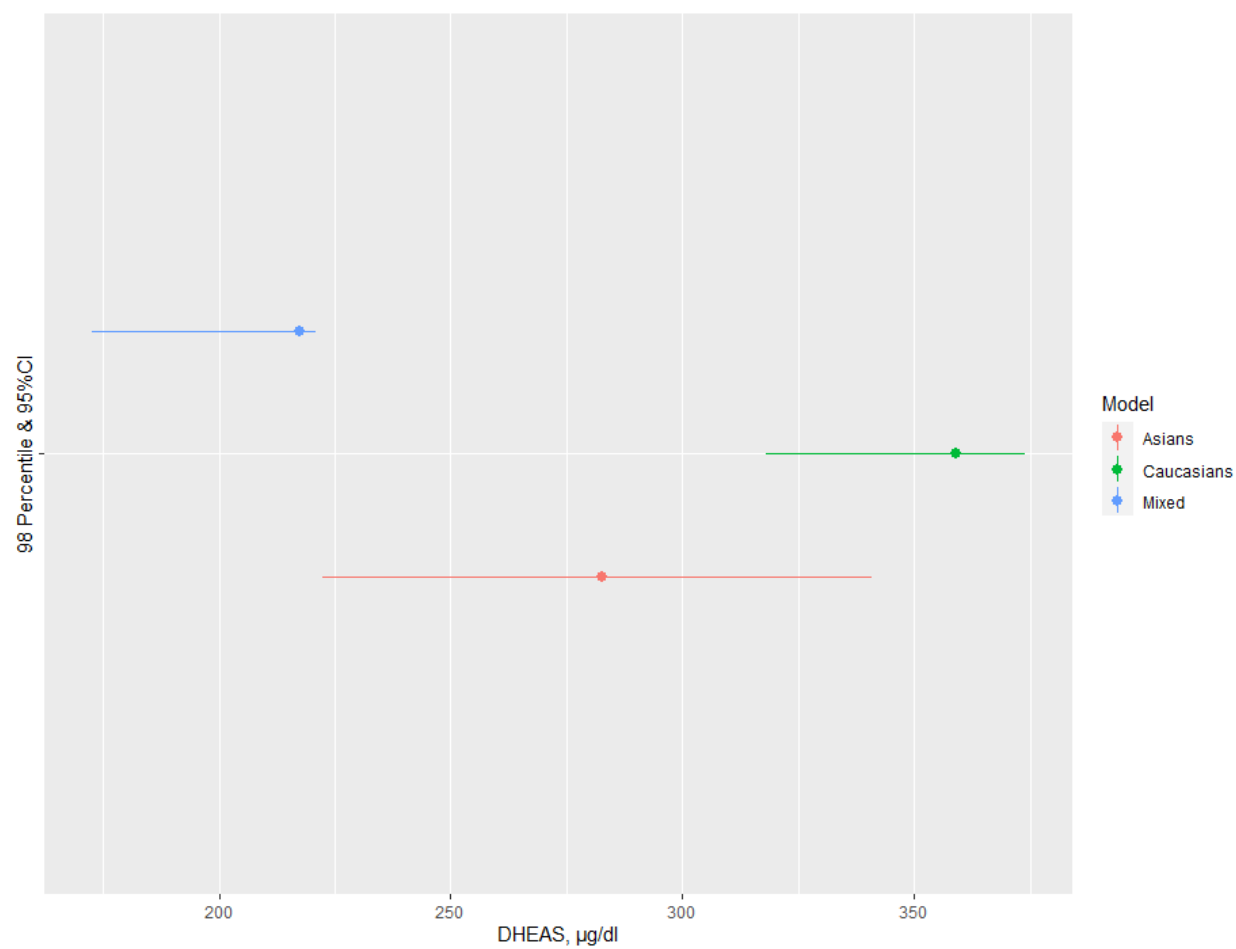

**Figure S3.** UNLs for DHEAS by ethnicity: the analysis of the 95% CIs overlapping.
